# Supplementary material
Source: Research Square preprint supplement (doi:10.21203/rs.3.rs-9310406/v1)
Supplement: Supplementary file 1 [file 1a3391604987e8ee4df6940c.xlsx]

## Sheet: Tabelle1
Supplementary Table S1: Overview on the total cohort with their corresponding genotype and sweat chloride values before and during ETI treatment. Variants are reported using legacy nomenclature where available; otherwise HGVS protein nomenclature is used (marked with a #)
Response Group	Legacy name	Genotype HGVS c.code	Genotype HGVS p.code	Complexallele [y/n]	Sweatchloride values before ETI (mmol/L)	Sweatchloride values during ETI (mmol/L)	Change [in %]
low responder	[F508del;L467F];[F508del;L467F]	c.[1521_1523del;1399C>T];[1521_1523del;1399C>T]	p.[Phe508del;Leu467Phe];[Phe508del;Leu467Phe]	y	109	101	7.33945
low responder	[F508del;1585-9412A>G];[1898+1G->A]	c.[1521_1523del;1585-9412A>G];[1766+1G>A]	p.[Phe508del;Glu528_Asp529insThrTrpAsnTrpArg*];[Arg560_Glu588del]	y	110	116	5.45455
low responder	[F508del;L467F];[N1303K]	c.[1521_1523del;1399C>T]; [3909C>G]	p.[Phe508del;Leu467Phe];[Asn1303Lys]	y	108	100	7.40741
low responder	[F508del;L467F];[F508del;L467F]	c.[1521_1523del;1399C>T];[1521_1523del;1399C>T]	p.[Phe508del;Leu467Phe];[Phe508del;Leu467Phe]	y	96	104	8.33333
low responder	[F508del;L467F];[CFTRdele2,3]	c.[1521_1523del;1399C>T];[54-5940_ 273+10246del]	p.[Phe508del;Leu467Phe];[?]	y	99	94	5.05051
low responder	[F508del;R75X]	c.[1521_1523del];[223C>T]	p.[Phe508del];[Arg75*]	n	103	88	14.5631
low responder	[F508del;L467F];[2184delA]	c.[1521_1523del;1399C>T];[2052del]	p.[Phe508del;Leu467Phe];[Lys684Asnfs*38]	y	109	99	9.17431
low responder	[F508del];[CFTRdele2,3]	c.[1521_1523del];[54-5940_ 273+10246del]	p.[Phe508del];[?]	n	102	87	14.7059
low responder	[F508del];[F508del]	c.[1521_1523del];[1521_1523del]	p.[Phe508del];[Phe508del]	n	107	98	8.41121
low responder	[F508del];[F508del]	c.[1521_1523del];[1521_1523del]	p.[Phe508del];[Phe508del]	n	103	91	11.6505
low responder	[F508del];[2721del11]	c.[1521_1523del];[2589_2599del]	p.[Phe508del];[Ile864Serfs*28]	n	87	86	1.14943
low responder	[F508del;L467F];[F508del;L467F]	c.[1521_1523del;1399C>T];[1521_1523del;1399C>T]	p.[Phe508del;Leu467Phe];[Phe508del;Leu467Phe]	y	101	88	13
low responder	[F508del;L467F];[G542X]	c.[1521_1523del;1399C>T];[1624G>T]	p.[Phe508del;Leu467Phe];[Gly542*]	y	102	116	14
low responder	[F508del];[3120+1G->A]	c.[1521_1523del];[2988+1G>A]	p.[Phe508del];[?]	n	99	92	7
intermediate responder	[F508del;L467F];[F508del;L467F]	c.[1521_1523del;1399C>T];[1521_1523del;1399C>T]	p.[Phe508del;Leu467Phe];[Phe508del;Leu467Phe]	y	103	85	17.4757
intermediate responder	[F508del];[G542X]	c.[1521_1523del];[1624G>T]	p.[Phe508del];[Gly542*]	n	96	62	35.4167
intermediate responder	[F508del];[W1282X]	c.[1521_1523del];[3846G>A]	p.[Phe508del];[Trp1282*]	n	110	79	28.1818
intermediate responder	[F508del];[CFTRdele2,3]	c.[1521_1523del];[54-5940_ 273+10246del]	p.[Phe508del];[?]	n	109	74	32.1101
intermediate responder	[F508del];[F508del]	c.[1521_1523del];[1521_1523del]	p.[Phe508del];[Phe508del]	n	110	79	28.1818
intermediate responder	[F508del];[p.(Glu1321_Val1322insLeuGln)#]	c.[1521_1523del];[3964-7A>G]	p.[Phe508del];[Glu1321_Val1322insLeuGln]	n	111	83	25.2252
intermediate responder	[F508del];[G542X]	c.[1521_1523del];[1624G>T]	p.[Phe508del];[Gly542*]	n	110	86	21.8182
intermediate responder	[F508del];[F508del]	c.[1521_1523del];[1521_1523del]	p.[Phe508del];[Phe508del]	n	104	72	30.7692
intermediate responder	[F508del];[F508del]	c.[1521_1523del];[1521_1523del]	p.[Phe508del];[Phe508del]	n	100	72	28
intermediate responder	[F508del];[N1303K]	c.[1521_1523del]; [3909C>G]	p.[Phe508del];[Asn1303Lys]	n	108	74	31.4815
intermediate responder	[F508del];[F508del]	c.[1521_1523del];[1521_1523del]	p.[Phe508del];[Phe508del]	n	94	69	26.5957
intermediate responder	[F508del];[F508del]	c.[1521_1523del];[1521_1523del]	p.[Phe508del];[Phe508del]	n	106	69	34.9057
high responder	[F508del];[N1303K]	c.[1521_1523del];[3909C>G]	p.[Phe508del];[Asn1303Lys]	n	119	67	43.6975
high responder	[F508del];[F508del]	c.[1521_1523del];[1521_1523del]	p.[Phe508del];[Phe508del]	n	106	62	41.5094
high responder	[F508del];[I507del]	c.[1521_1523del];[1519_1521del]	p.[Phe508del];[Ile507del]	n	101	33	67.3267
high responder	[F508del];[F508del]	c.[1521_1523del];[1521_1523del]	p.[Phe508del];[Phe508del]	n	108	34	68.5185
high responder	[F508del];[F508del]	c.[1521_1523del];[1521_1523del]	p.[Phe508del];[Phe508del]	n	74	21	71.6216
high responder	[F508del];[F508del]	c.[1521_1523del];[1521_1523del]	p.[Phe508del];[Phe508del]	n	101	19	81.1881
high responder	[F508de];[R347P]	c.[1521_1523del];[1040G>C]	p.[Phe508del];[Arg347Pro]	n	99	55	44.4444
high responder	[F508del];[1717-1G->A]	c.[1521_1523del];[1585-1G>A]	p.[Phe508del];[?]	n	108	57	47.2222
high responder	[F508del];[F508del]	c.[1521_1523del];[1521_1523del]	p.[Phe508del];[Phe508del]	n	95	24	74.7368
high responder	[F508del];[F508del]	c.[1521_1523del];[1521_1523del]	p.[Phe508del];[Phe508del]	n	91	9	90.1099
high responder	[F508del];[R553X]	c.[1521_1523del];[1657C>T]	p.[Phe508del];[Arg553*]	n	108	60	44.4444
high responder	[F508del];[F508del]	c.[1521_1523del];[1521_1523del]	p.[Phe508del];[Phe508del]	n	95	31	67.3684
high responder	[F508del];[F508del]	c.[1521_1523del];[1521_1523del]	p.[Phe508del];[Phe508del]	n	89	9	89.8876
high responder	[F508del];[F508del]	c.[1521_1523del];[1521_1523del]	p.[Phe508del];[Phe508del]	n	108	10	90.7407
high responder	[F508del];[F508del]	c.[1521_1523del];[1521_1523del]	p.[Phe508del];[Phe508del]	n	91	22	75.8242
high responder	[F508del;1874insT];[F508del]	c.[1521_1523del;1742dup];[1521_1523del]	p.[Phe508del];[Leu581Phefs*8]	y	102	40	60.7843
-	[F508del];[F508del]	c.[1521_1523del];[1521_1523del]	p.[Phe508del];[Phe508del]	n	-	100
-	[F508del;L467F];[p.(Gly91=)#]	c.[1521_1523del;1399C>T];[273G>A]	p.[Phe508del];[Gly91=]	y	70	-
